# Supplementary material for: Factors associated with post-acute discharge location after hospital stay: a cross-sectional study from a Swiss hospital
Source: Springer Nature journal article supplement (doi:10.1186/s12913-019-4101-6), 2019-05-08
Supplement: MOESM1 [file 16709260]

## Supplementary

*Supplementary table.* Places of Discharge (n=659).

| <b>Place of Discharge</b>   | <b>Number of Patients (Percentage)</b> |
|-----------------------------|----------------------------------------|
| Rehabilitation              | 262 (39.8%)                            |
| Acute and transitional care | 161 (24.4%)                            |
| Home (with or without help) | 113 (17.1%)                            |
| Nursing home                | 41 (6.2%)                              |
| Acute geriatric hospital    | 29 (4.4%)                              |
| Curative institutions       | 16 (2.4%)                              |
| Others                      | 37 (5.6%)                              |

*Note.* Due to rounding percentages may not add up to 100%. Total number of patients was n=660, but for one patient information on place of discharge was not available from the medical record.
